# Supplementary material
Source: publisher figshare collection journal article supplement (https://acs.figshare.com/ndownloader/files/5109091)
Supplement: Supplementary file 1 [file 5109091]

 
data_'compound3' 
 
_audit_creation_method            SHELXL-97 
_chemical_name_systematic 
; 
 ? 
; 
_chemical_name_common             ? 
_chemical_melting_point           ? 
_chemical_formula_moiety          ? 
_chemical_formula_sum 
 'C109 H112 Cl3 O27 Sn6' 
_chemical_formula_weight          2672.48 
 
loop_ 
 _atom_type_symbol 
 _atom_type_description 
 _atom_type_scat_dispersion_real 
 _atom_type_scat_dispersion_imag 
 _atom_type_scat_source 
 'C'  'C'   0.0033   0.0016 
 'International Tables Vol C Tables 4.2.6.8 and 6.1.1.4' 
 'H'  'H'   0.0000   0.0000 
 'International Tables Vol C Tables 4.2.6.8 and 6.1.1.4' 
 'O'  'O'   0.0106   0.0060 
 'International Tables Vol C Tables 4.2.6.8 and 6.1.1.4' 
 'Sn'  'Sn'  -0.6537   1.4246 
 'International Tables Vol C Tables 4.2.6.8 and 6.1.1.4' 
 'Cl'  'Cl'   0.1484   0.1585 
 'International Tables Vol C Tables 4.2.6.8 and 6.1.1.4' 
 
_symmetry_cell_setting            triclinic 
_symmetry_space_group_name_H-M    P-1
 
loop_ 
 _symmetry_equiv_pos_as_xyz 
 'x, y, z' 
 '-x, -y, -z' 
 
_cell_length_a                    16.387(3) 
_cell_length_b                    17.701(3) 
_cell_length_c                    22.903(4) 
_cell_angle_alpha                 86.44(2) 
_cell_angle_beta                  88.20(2) 
_cell_angle_gamma                 64.628(17) 
_cell_volume                      5990.9(18) 
_cell_formula_units_Z             2 
_cell_measurement_temperature     200(2) 
_cell_measurement_reflns_used     ? 
_cell_measurement_theta_min       ? 
_cell_measurement_theta_max       ? 
 
_exptl_crystal_description        prism 
_exptl_crystal_colour             colourless
_exptl_crystal_size_max           0.3 
_exptl_crystal_size_mid           0.2 
_exptl_crystal_size_min           0.2
_exptl_crystal_density_meas       ? 
_exptl_crystal_density_diffrn     1.481 
_exptl_crystal_density_method     'not measured' 
_exptl_crystal_F_000              2666 
_exptl_absorpt_coefficient_mu     1.365 
_exptl_absorpt_correction_type    'not applied' 
_exptl_absorpt_correction_T_min   ? 
_exptl_absorpt_correction_T_max   ? 
_exptl_absorpt_process_details    ? 
 
_exptl_special_details 
; 
 ? 
; 
 
_diffrn_ambient_temperature       200(2) 
_diffrn_radiation_wavelength      0.71073 
_diffrn_radiation_type            MoK\a 
_diffrn_radiation_source          'fine-focus sealed tube' 
_diffrn_radiation_monochromator   graphite 
_diffrn_measurement_device_type   'Stoe IPDS' 
_diffrn_measurement_method        ? 
_diffrn_detector_area_resol_mean  ? 
_diffrn_standards_number          ? 
_diffrn_standards_interval_count  ? 
_diffrn_standards_interval_time   ? 
_diffrn_standards_decay_%         ? 
_diffrn_reflns_number             32304 
_diffrn_reflns_av_R_equivalents   0.0643 
_diffrn_reflns_av_sigmaI/netI     0.0970 
_diffrn_reflns_limit_h_min        -17 
_diffrn_reflns_limit_h_max        16 
_diffrn_reflns_limit_k_min        -19 
_diffrn_reflns_limit_k_max        18 
_diffrn_reflns_limit_l_min        -24 
_diffrn_reflns_limit_l_max        24 
_diffrn_reflns_theta_min          4.13 
_diffrn_reflns_theta_max          22.49 
_reflns_number_total              14780 
_reflns_number_gt                 8437 
_reflns_threshold_expression      >2sigma(I) 
 
_computing_data_collection        ? 
_computing_cell_refinement        ? 
_computing_data_reduction         ? 
_computing_structure_solution     'SHELXS-97 (Sheldrick, 1990)' 
_computing_structure_refinement   'SHELXL-97 (Sheldrick, 1997)' 
_computing_molecular_graphics     ? 
_computing_publication_material   ? 
 
_refine_special_details 
; 
 Refinement of F^2^ against ALL reflections.  The weighted R-factor wR and 
 goodness of fit S are based on F^2^, conventional R-factors R are based 
 on F, with F set to zero for negative F^2^. The threshold expression of 
 F^2^ > 2sigma(F^2^) is used only for calculating R-factors(gt) etc. and is 
 not relevant to the choice of reflections for refinement.  R-factors based 
 on F^2^ are statistically about twice as large as those based on F, and R- 
 factors based on ALL data will be even larger. 
; 
 
_refine_ls_structure_factor_coef  Fsqd  
_refine_ls_matrix_type            full 
_refine_ls_weighting_scheme       calc  
_refine_ls_weighting_details 
 'calc w=1/[\s^2^(Fo^2^)+(0.0725P)^2^+0.0000P] where P=(Fo^2^+2Fc^2^)/3' 
_atom_sites_solution_primary      direct 
_atom_sites_solution_secondary    difmap 
_atom_sites_solution_hydrogens    geom 
_refine_ls_hydrogen_treatment     mixed 
_refine_ls_extinction_method      none 
_refine_ls_extinction_coef        ? 
_refine_ls_number_reflns          14780 
_refine_ls_number_parameters      1321 
_refine_ls_number_restraints      450 
_refine_ls_R_factor_all           0.0897 
_refine_ls_R_factor_gt            0.0487 
_refine_ls_wR_factor_ref          0.1314 
_refine_ls_wR_factor_gt           0.1197 
_refine_ls_goodness_of_fit_ref    0.865 
_refine_ls_restrained_S_all       0.876 
_refine_ls_shift/su_max           0.001 
_refine_ls_shift/su_mean          0.000 
 
loop_ 
 _atom_site_label 
 _atom_site_type_symbol 
 _atom_site_fract_x 
 _atom_site_fract_y 
 _atom_site_fract_z 
 _atom_site_U_iso_or_equiv 
 _atom_site_adp_type 
 _atom_site_occupancy 
 _atom_site_symmetry_multiplicity 
 _atom_site_calc_flag 
 _atom_site_refinement_flags 
 _atom_site_disorder_assembly 
 _atom_site_disorder_group 
Sn1 Sn 0.33042(4) 0.16486(4) 0.82824(3) 0.04200(19) Uani 1 1 d . . . 
Sn2 Sn 0.49810(4) -0.02947(4) 0.83415(3) 0.04011(18) Uani 1 1 d . . . 
Sn3 Sn 0.07178(5) 0.03778(5) 0.80604(3) 0.0551(2) Uani 1 1 d . B . 
Sn4 Sn 0.23759(5) -0.15758(5) 0.81777(3) 0.0505(2) Uani 1 1 d . D . 
Sn5 Sn 0.23823(5) 0.10635(4) 0.60452(3) 0.04115(18) Uani 1 1 d . F . 
Sn6 Sn 0.39959(4) -0.09068(4) 0.61383(2) 0.03689(17) Uani 1 1 d . H . 
O1 O 0.4115(4) 0.0655(4) 0.7766(2) 0.0396(15) Uani 1 1 d . . . 
H1 H 0.4093 0.0640 0.7353 0.048 Uiso 1 1 calc R . . 
O2 O 0.4048(4) 0.0639(4) 0.8857(3) 0.0520(17) Uani 1 1 d . . . 
H2 H 0.3979 0.0607 0.9270 0.062 Uiso 1 1 calc R . . 
O3 O 0.2055(4) -0.0332(4) 0.8338(3) 0.0514(17) Uani 1 1 d . . . 
H3 H 0.2439 -0.0126 0.8504 0.062 Uiso 1 1 calc R . . 
O4 O 0.1116(5) -0.0843(4) 0.7776(3) 0.061(2) Uani 1 1 d . . . 
H4 H 0.0797 -0.1025 0.7522 0.073 Uiso 1 1 calc R . . 
O5 O 0.2690(4) -0.0144(4) 0.6411(2) 0.0400(15) Uani 1 1 d . . . 
H5 H 0.2308 -0.0310 0.6654 0.048 Uiso 1 1 calc R . . 
O6 O 0.3760(4) 0.0332(4) 0.5883(2) 0.0433(15) Uani 1 1 d . . . 
H6 H 0.4188 0.0521 0.5727 0.052 Uiso 1 1 calc R . . 
O11 O 0.2323(4) 0.2305(4) 0.8846(3) 0.0568(19) Uani 1 1 d . . . 
O12 O 0.2336(4) 0.1116(4) 0.8220(3) 0.0434(16) Uani 1 1 d . . . 
O13 O 0.0858(4) 0.1472(4) 0.8327(3) 0.0549(18) Uani 1 1 d . . . 
O21 O 0.5379(4) -0.1247(4) 0.8961(3) 0.0507(17) Uani 1 1 d . . . 
O22 O 0.3969(4) -0.0760(4) 0.8274(2) 0.0415(15) Uani 1 1 d . . . 
O23 O 0.3706(4) -0.1893(4) 0.8513(3) 0.0496(17) Uani 1 1 d . . . 
O31 O -0.0324(4) 0.0998(5) 0.7509(3) 0.065(2) Uani 1 1 d . . . 
O32 O 0.1381(4) 0.0613(4) 0.7279(3) 0.0470(17) Uani 1 1 d . . . 
O33 O 0.1079(4) 0.1469(4) 0.6481(3) 0.0541(17) Uani 1 1 d . . . 
O41 O 0.2723(5) -0.2616(4) 0.7743(3) 0.0587(19) Uani 1 1 d . . . 
O42 O 0.2972(4) -0.1303(4) 0.7386(3) 0.0451(16) Uani 1 1 d . . . 
O43 O 0.3917(4) -0.1945(4) 0.6662(3) 0.0450(16) Uani 1 1 d . . . 
O51 O 0.2450(5) 0.2173(4) 0.5935(3) 0.0540(18) Uani 1 1 d . . . 
O52 O 0.2743(4) 0.1252(4) 0.6915(2) 0.0377(14) Uani 1 1 d . . . 
O53 O 0.2619(4) 0.2282(4) 0.7475(3) 0.0477(17) Uani 1 1 d . . . 
O61 O 0.5361(4) -0.1431(4) 0.6092(2) 0.0419(15) Uani 1 1 d . . . 
O62 O 0.4377(4) -0.0650(4) 0.6975(2) 0.0362(14) Uani 1 1 d . . . 
O63 O 0.5539(4) -0.1043(4) 0.7584(2) 0.0414(15) Uani 1 1 d . . . 
C11 C 0.4064(7) 0.2373(6) 0.8282(5) 0.065(3) Uani 1 1 d DU . . 
H11A H 0.4370 0.2272 0.8664 0.078 Uiso 1 1 calc R . . 
H11B H 0.4538 0.2176 0.7976 0.078 Uiso 1 1 calc R . . 
C12 C 0.3501(9) 0.3313(7) 0.8174(6) 0.089(4) Uani 1 1 d DU . . 
H12A H 0.3206 0.3414 0.7788 0.106 Uiso 1 1 calc R . . 
H12B H 0.3019 0.3507 0.8475 0.106 Uiso 1 1 calc R . . 
C13 C 0.4030(11) 0.3836(9) 0.8185(7) 0.121(5) Uani 1 1 d DU . . 
H13A H 0.4309 0.3744 0.8576 0.145 Uiso 1 1 calc R . . 
H13B H 0.4528 0.3622 0.7895 0.145 Uiso 1 1 calc R . . 
C14 C 0.3526(16) 0.4741(10) 0.8063(10) 0.188(10) Uani 1 1 d DU . . 
H14A H 0.3936 0.5010 0.8081 0.282 Uiso 1 1 calc R . . 
H14B H 0.3045 0.4970 0.8356 0.282 Uiso 1 1 calc R . . 
H14C H 0.3260 0.4847 0.7673 0.282 Uiso 1 1 calc R . . 
C21 C 0.6114(8) 0.0002(8) 0.8375(4) 0.069(3) Uani 1 1 d DU . . 
H21A H 0.6046 0.0317 0.8729 0.083 Uiso 1 1 calc R . . 
H21B H 0.6663 -0.0532 0.8428 0.083 Uiso 1 1 calc R . . 
C22 C 0.6281(10) 0.0504(11) 0.7854(6) 0.123(5) Uani 1 1 d DU . . 
H22A H 0.6340 0.0203 0.7494 0.147 Uiso 1 1 calc R . . 
H22B H 0.5751 0.1053 0.7807 0.147 Uiso 1 1 calc R . . 
C23 C 0.7117(11) 0.0647(13) 0.7921(7) 0.145(7) Uani 1 1 d DU . . 
H23A H 0.7125 0.0799 0.8329 0.174 Uiso 1 1 calc R . . 
H23B H 0.7646 0.0104 0.7875 0.174 Uiso 1 1 calc R . . 
C24 C 0.7254(11) 0.1232(10) 0.7562(8) 0.129(6) Uani 1 1 d DU . . 
H24A H 0.7821 0.1249 0.7667 0.194 Uiso 1 1 calc R . . 
H24B H 0.6752 0.1784 0.7608 0.194 Uiso 1 1 calc R . . 
H24C H 0.7288 0.1082 0.7154 0.194 Uiso 1 1 calc R . . 
C31 C -0.0015(9) 0.0299(9) 0.8822(6) 0.096(4) Uani 1 1 d DU . . 
H31A H -0.0437 0.0067 0.8711 0.115 Uiso 1 1 calc R A 1 
H31B H 0.0421 -0.0117 0.9101 0.115 Uiso 1 1 calc R A 1 
C32 C -0.0553(14) 0.1071(11) 0.9149(9) 0.111(8) Uiso 0.70(3) 1 d PDU B 1 
H32A H -0.0151 0.1333 0.9247 0.133 Uiso 0.70(3) 1 calc PR B 1 
H32B H -0.0772 0.0906 0.9521 0.133 Uiso 0.70(3) 1 calc PR B 1 
C33 C -0.1349(15) 0.1709(13) 0.8811(10) 0.127(9) Uiso 0.70(3) 1 d PDU B 1 
H33A H -0.1121 0.1869 0.8441 0.153 Uiso 0.70(3) 1 calc PR B 1 
H33B H -0.1738 0.1437 0.8707 0.153 Uiso 0.70(3) 1 calc PR B 1 
C34 C -0.1912(18) 0.2475(14) 0.9104(14) 0.142(11) Uiso 0.70(3) 1 d PDU B 1 
H34A H -0.2414 0.2835 0.8848 0.213 Uiso 0.70(3) 1 calc PR B 1 
H34B H -0.1548 0.2772 0.9190 0.213 Uiso 0.70(3) 1 calc PR B 1 
H34C H -0.2152 0.2330 0.9470 0.213 Uiso 0.70(3) 1 calc PR B 1 
C32' C -0.0950(18) 0.1024(17) 0.889(3) 0.122(14) Uiso 0.30(3) 1 d PDU B 2 
H32C H -0.1340 0.1016 0.8575 0.146 Uiso 0.30(3) 1 calc PR B 2 
H32D H -0.1214 0.0922 0.9268 0.146 Uiso 0.30(3) 1 calc PR B 2 
C33' C -0.098(3) 0.1887(19) 0.889(3) 0.155(18) Uiso 0.30(3) 1 d PDU B 2 
H33C H -0.0707 0.1926 0.9258 0.186 Uiso 0.30(3) 1 calc PR B 2 
H33D H -0.0572 0.1923 0.8568 0.186 Uiso 0.30(3) 1 calc PR B 2 
C34' C -0.183(4) 0.262(2) 0.882(4) 0.15(3) Uiso 0.30(3) 1 d PDU B 2 
H34D H -0.1720 0.3094 0.8652 0.228 Uiso 0.30(3) 1 calc PR B 2 
H34E H -0.2124 0.2762 0.9202 0.228 Uiso 0.30(3) 1 calc PR B 2 
H34F H -0.2221 0.2509 0.8557 0.228 Uiso 0.30(3) 1 calc PR B 2 
C41 C 0.1886(9) -0.1931(7) 0.8957(6) 0.088(4) Uani 1 1 d DU . . 
H41A H 0.1973 -0.1623 0.9278 0.106 Uiso 1 1 calc R C 1 
H41B H 0.1227 -0.1744 0.8915 0.106 Uiso 1 1 calc R C 1 
C42 C 0.2304(12) -0.2859(10) 0.9145(10) 0.069(7) Uiso 0.53(2) 1 d PDU D 1 
H42A H 0.2012 -0.2925 0.9517 0.083 Uiso 0.53(2) 1 calc PR D 1 
H42B H 0.2139 -0.3153 0.8849 0.083 Uiso 0.53(2) 1 calc PR D 1 
C43 C 0.3302(13) -0.3305(13) 0.9230(12) 0.089(8) Uiso 0.53(2) 1 d PDU D 1 
H43A H 0.3598 -0.3347 0.8842 0.107 Uiso 0.53(2) 1 calc PR D 1 
H43B H 0.3490 -0.2956 0.9465 0.107 Uiso 0.53(2) 1 calc PR D 1 
C44 C 0.365(2) -0.4147(14) 0.9515(13) 0.108(10) Uiso 0.53(2) 1 d PDU D 1 
H44A H 0.4304 -0.4378 0.9548 0.162 Uiso 0.53(2) 1 calc PR D 1 
H44B H 0.3486 -0.4509 0.9282 0.162 Uiso 0.53(2) 1 calc PR D 1 
H44C H 0.3377 -0.4117 0.9907 0.162 Uiso 0.53(2) 1 calc PR D 1 
C42' C 0.2530(18) -0.2599(13) 0.9357(10) 0.092(9) Uiso 0.47(2) 1 d PDU D 2 
H42C H 0.2226 -0.2629 0.9733 0.111 Uiso 0.47(2) 1 calc PR D 2 
H42D H 0.3046 -0.2471 0.9440 0.111 Uiso 0.47(2) 1 calc PR D 2 
C43' C 0.287(2) -0.3427(14) 0.9072(11) 0.092(9) Uiso 0.47(2) 1 d PDU D 2 
H43C H 0.2359 -0.3432 0.8850 0.110 Uiso 0.47(2) 1 calc PR D 2 
H43D H 0.3341 -0.3455 0.8785 0.110 Uiso 0.47(2) 1 calc PR D 2 
C44' C 0.323(4) -0.4178(19) 0.945(2) 0.22(3) Uiso 0.47(2) 1 d PDU D 2 
H44D H 0.3398 -0.4671 0.9221 0.326 Uiso 0.47(2) 1 calc PR D 2 
H44E H 0.2767 -0.4164 0.9742 0.326 Uiso 0.47(2) 1 calc PR D 2 
H44F H 0.3759 -0.4209 0.9655 0.326 Uiso 0.47(2) 1 calc PR D 2 
C51 C 0.1841(8) 0.0967(7) 0.5243(4) 0.069(3) Uani 1 1 d DU . . 
H51A H 0.2285 0.0937 0.4932 0.083 Uiso 1 1 calc R E 1 
H51B H 0.1794 0.0426 0.5262 0.083 Uiso 1 1 calc R E 1 
C52 C 0.0932(11) 0.1645(9) 0.5050(9) 0.070(6) Uiso 0.615(19) 1 d PDU F 1 
H52A H 0.0493 0.1781 0.5378 0.083 Uiso 0.615(19) 1 calc PR F 1 
H52B H 0.0690 0.1462 0.4723 0.083 Uiso 0.615(19) 1 calc PR F 1 
C53 C 0.1113(17) 0.2420(13) 0.4849(11) 0.114(9) Uiso 0.615(19) 1 d PDU F 1 
H53A H 0.1155 0.2692 0.5205 0.136 Uiso 0.615(19) 1 calc PR F 1 
H53B H 0.1714 0.2209 0.4657 0.136 Uiso 0.615(19) 1 calc PR F 1 
C54 C 0.0496(19) 0.3043(15) 0.4469(12) 0.123(10) Uiso 0.615(19) 1 d PDU F 1 
H54A H 0.0720 0.3466 0.4362 0.184 Uiso 0.615(19) 1 calc PR F 1 
H54B H -0.0091 0.3308 0.4666 0.184 Uiso 0.615(19) 1 calc PR F 1 
H54C H 0.0430 0.2790 0.4116 0.184 Uiso 0.615(19) 1 calc PR F 1 
C52' C 0.130(2) 0.1715(15) 0.4853(11) 0.097(10) Uiso 0.385(19) 1 d PDU F 2 
H52C H 0.1076 0.1521 0.4522 0.116 Uiso 0.385(19) 1 calc PR F 2 
H52D H 0.1703 0.1958 0.4690 0.116 Uiso 0.385(19) 1 calc PR F 2 
C53' C 0.0487(15) 0.2410(13) 0.5130(10) 0.053(8) Uiso 0.385(19) 1 d PDU F 2 
H53C H 0.0026 0.2200 0.5227 0.063 Uiso 0.385(19) 1 calc PR F 2 
H53D H 0.0682 0.2537 0.5502 0.063 Uiso 0.385(19) 1 calc PR F 2 
C54' C 0.007(3) 0.3178(18) 0.4776(19) 0.136(17) Uiso 0.385(19) 1 d PDU F 2 
H54D H -0.0424 0.3593 0.4996 0.204 Uiso 0.385(19) 1 calc PR F 2 
H54E H -0.0170 0.3071 0.4419 0.204 Uiso 0.385(19) 1 calc PR F 2 
H54F H 0.0520 0.3391 0.4671 0.204 Uiso 0.385(19) 1 calc PR F 2 
C61 C 0.3712(7) -0.1341(6) 0.5352(4) 0.062(3) Uani 1 1 d DU . . 
H61A H 0.3060 -0.1205 0.5343 0.075 Uiso 1 1 calc R G 1 
H61B H 0.3848 -0.1042 0.5011 0.075 Uiso 1 1 calc R G 1 
C62 C 0.4258(11) -0.2286(8) 0.5300(7) 0.071(5) Uiso 0.756(17) 1 d PDU H 1 
H62A H 0.4888 -0.2400 0.5192 0.086 Uiso 0.756(17) 1 calc PR H 1 
H62B H 0.4270 -0.2573 0.5687 0.086 Uiso 0.756(17) 1 calc PR H 1 
C63 C 0.3888(11) -0.2647(9) 0.4856(6) 0.077(5) Uiso 0.756(17) 1 d PDU H 1 
H63A H 0.3241 -0.2476 0.4950 0.092 Uiso 0.756(17) 1 calc PR H 1 
H63B H 0.3916 -0.2375 0.4470 0.092 Uiso 0.756(17) 1 calc PR H 1 
C64 C 0.4297(15) -0.3543(10) 0.4791(9) 0.110(7) Uiso 0.756(17) 1 d PDU H 1 
H64A H 0.3987 -0.3675 0.4481 0.165 Uiso 0.756(17) 1 calc PR H 1 
H64B H 0.4245 -0.3830 0.5160 0.165 Uiso 0.756(17) 1 calc PR H 1 
H64C H 0.4936 -0.3730 0.4687 0.165 Uiso 0.756(17) 1 calc PR H 1 
C62' C 0.373(2) -0.2190(12) 0.5295(16) 0.036(9) Uiso 0.244(17) 1 d PDU H 2 
H62C H 0.3410 -0.2185 0.4935 0.044 Uiso 0.244(17) 1 calc PR H 2 
H62D H 0.3414 -0.2321 0.5633 0.044 Uiso 0.244(17) 1 calc PR H 2 
C63' C 0.470(2) -0.2866(19) 0.527(2) 0.095(15) Uiso 0.244(17) 1 d PDU H 2 
H63C H 0.5065 -0.2637 0.5033 0.114 Uiso 0.244(17) 1 calc PR H 2 
H63D H 0.4946 -0.2993 0.5671 0.114 Uiso 0.244(17) 1 calc PR H 2 
C64' C 0.481(4) -0.365(2) 0.503(3) 0.11(2) Uiso 0.244(17) 1 d PDU H 2 
H64D H 0.5453 -0.4045 0.5044 0.160 Uiso 0.244(17) 1 calc PR H 2 
H64E H 0.4611 -0.3539 0.4621 0.160 Uiso 0.244(17) 1 calc PR H 2 
H64F H 0.4455 -0.3884 0.5257 0.160 Uiso 0.244(17) 1 calc PR H 2 
C100 C 0.1564(7) 0.1564(6) 0.8419(4) 0.047(2) Uani 1 1 d . . . 
C101 C 0.1499(8) 0.2244(7) 0.8831(4) 0.060(3) Uani 1 1 d . . . 
C102 C 0.0717(8) 0.3088(9) 0.8660(6) 0.071(4) Uani 1 1 d . . . 
C103 C 0.0633(9) 0.3624(10) 0.8183(7) 0.087(4) Uani 1 1 d . . . 
H103 H 0.1090 0.3468 0.7890 0.104 Uiso 1 1 calc R . . 
C104 C -0.0119(12) 0.4396(11) 0.8125(8) 0.124(6) Uani 1 1 d . . . 
H104 H -0.0175 0.4769 0.7797 0.149 Uiso 1 1 calc R . . 
C105 C -0.0791(14) 0.4613(15) 0.8559(13) 0.150(10) Uani 1 1 d . . . 
H105 H -0.1318 0.5127 0.8520 0.180 Uiso 1 1 calc R . . 
C106 C -0.0683(14) 0.4073(16) 0.9049(12) 0.140(9) Uani 1 1 d . . . 
H106 H -0.1128 0.4234 0.9349 0.168 Uiso 1 1 calc R . . 
C107 C 0.0068(10) 0.3298(13) 0.9106(8) 0.096(5) Uani 1 1 d . . . 
C108 C 0.0351(11) 0.2638(13) 0.9573(8) 0.100(5) Uani 1 1 d . . . 
C109 C -0.0027(13) 0.2537(17) 1.0114(8) 0.134(10) Uani 1 1 d . . . 
H109 H -0.0592 0.2964 1.0226 0.161 Uiso 1 1 calc R . . 
C110 C 0.0362(19) 0.189(2) 1.0466(9) 0.167(14) Uani 1 1 d . . . 
H110 H 0.0074 0.1840 1.0823 0.200 Uiso 1 1 calc R . . 
C111 C 0.1231(13) 0.1248(12) 1.0318(5) 0.112(6) Uani 1 1 d . . . 
H111 H 0.1516 0.0770 1.0577 0.134 Uiso 1 1 calc R . . 
C112 C 0.1656(11) 0.1325(11) 0.9795(6) 0.090(5) Uani 1 1 d . . . 
H112 H 0.2240 0.0917 0.9697 0.108 Uiso 1 1 calc R . . 
C113 C 0.1202(9) 0.2004(10) 0.9435(6) 0.074(4) Uani 1 1 d . . . 
C200 C 0.4140(7) -0.1456(7) 0.8559(4) 0.048(3) Uani 1 1 d . . . 
C201 C 0.4927(7) -0.1759(7) 0.9013(4) 0.051(3) Uani 1 1 d . . . 
C202 C 0.4484(8) -0.1743(9) 0.9601(4) 0.068(3) Uani 1 1 d . . . 
C203 C 0.3893(9) -0.1097(10) 0.9886(5) 0.081(4) Uani 1 1 d . . . 
H203 H 0.3694 -0.0542 0.9720 0.098 Uiso 1 1 calc R . . 
C204 C 0.3567(12) -0.1248(14) 1.0438(6) 0.112(6) Uani 1 1 d . . . 
H204 H 0.3141 -0.0790 1.0642 0.135 Uiso 1 1 calc R . . 
C205 C 0.3849(16) -0.2025(18) 1.0678(7) 0.135(9) Uani 1 1 d . . . 
H205 H 0.3632 -0.2103 1.1056 0.162 Uiso 1 1 calc R . . 
C206 C 0.4449(14) -0.2724(14) 1.0393(7) 0.122(7) Uani 1 1 d . . . 
H206 H 0.4617 -0.3272 1.0566 0.147 Uiso 1 1 calc R . . 
C207 C 0.4814(11) -0.2604(10) 0.9830(5) 0.090(5) Uani 1 1 d . . . 
C208 C 0.5443(10) -0.3156(10) 0.9438(6) 0.083(4) Uani 1 1 d . . . 
C209 C 0.5907(13) -0.3995(11) 0.9484(8) 0.119(6) Uani 1 1 d . . . 
H209 H 0.5804 -0.4312 0.9803 0.143 Uiso 1 1 calc R . . 
C210 C 0.6525(12) -0.4376(10) 0.9065(8) 0.112(5) Uani 1 1 d . . . 
H210 H 0.6871 -0.4965 0.9100 0.135 Uiso 1 1 calc R . . 
C211 C 0.6664(10) -0.3926(9) 0.8585(7) 0.097(4) Uani 1 1 d . . . 
H211 H 0.7116 -0.4202 0.8304 0.117 Uiso 1 1 calc R . . 
C212 C 0.6141(8) -0.3073(8) 0.8521(6) 0.073(3) Uani 1 1 d . . . 
H212 H 0.6196 -0.2765 0.8179 0.087 Uiso 1 1 calc R . . 
C213 C 0.5526(8) -0.2664(8) 0.8965(5) 0.064(3) Uani 1 1 d . . . 
C300 C 0.0820(7) 0.1147(6) 0.6911(5) 0.050(3) Uani 1 1 d . . . 
C301 C -0.0177(7) 0.1339(7) 0.6991(5) 0.059(3) Uani 1 1 d . . . 
C302 C -0.0747(7) 0.2291(8) 0.6907(5) 0.073(4) Uani 1 1 d . . . 
C303 C -0.0816(8) 0.2905(9) 0.7279(6) 0.087(4) Uani 1 1 d . . . 
H303 H -0.0475 0.2774 0.7629 0.104 Uiso 1 1 calc R . . 
C304 C -0.1415(11) 0.3730(11) 0.7112(9) 0.117(6) Uani 1 1 d . . . 
H304 H -0.1501 0.4161 0.7367 0.140 Uiso 1 1 calc R . . 
C305 C -0.1887(12) 0.3942(11) 0.6589(9) 0.132(6) Uani 1 1 d . . . 
H305 H -0.2242 0.4514 0.6475 0.158 Uiso 1 1 calc R . . 
C306 C -0.1840(12) 0.3314(11) 0.6228(8) 0.126(6) Uani 1 1 d . . . 
H306 H -0.2210 0.3447 0.5892 0.151 Uiso 1 1 calc R . . 
C307 C -0.1252(9) 0.2507(9) 0.6372(6) 0.088(4) Uani 1 1 d . . . 
C308 C -0.1046(8) 0.1711(8) 0.6089(6) 0.074(3) Uani 1 1 d . . . 
C309 C -0.1364(9) 0.1558(10) 0.5595(6) 0.090(4) Uani 1 1 d . . . 
H309 H -0.1798 0.2003 0.5362 0.108 Uiso 1 1 calc R . . 
C310 C -0.1046(10) 0.0747(11) 0.5438(6) 0.088(4) Uani 1 1 d . . . 
H310 H -0.1259 0.0641 0.5085 0.105 Uiso 1 1 calc R . . 
C311 C -0.0430(9) 0.0072(10) 0.5769(6) 0.076(4) Uani 1 1 d . . . 
H311 H -0.0217 -0.0484 0.5648 0.091 Uiso 1 1 calc R . . 
C312 C -0.0141(8) 0.0244(7) 0.6278(5) 0.065(3) Uani 1 1 d . . . 
H312 H 0.0276 -0.0203 0.6518 0.078 Uiso 1 1 calc R . . 
C313 C -0.0438(7) 0.1036(7) 0.6443(5) 0.059(3) Uani 1 1 d . . . 
C400 C 0.3371(7) -0.1912(6) 0.7081(4) 0.045(2) Uani 1 1 d . . . 
C401 C 0.3209(7) -0.2710(6) 0.7215(4) 0.050(3) Uani 1 1 d . . . 
C402 C 0.4056(8) -0.3500(6) 0.7203(5) 0.057(3) Uani 1 1 d . . . 
C403 C 0.4765(9) -0.3804(8) 0.7601(6) 0.076(4) Uani 1 1 d . . . 
H403 H 0.4761 -0.3495 0.7927 0.091 Uiso 1 1 calc R . . 
C404 C 0.5478(10) -0.4574(9) 0.7505(7) 0.096(5) Uani 1 1 d . . . 
H404 H 0.5955 -0.4818 0.7779 0.116 Uiso 1 1 calc R . . 
C405 C 0.5490(12) -0.5001(9) 0.6990(9) 0.107(6) Uani 1 1 d . . . 
H405 H 0.6005 -0.5503 0.6911 0.128 Uiso 1 1 calc R . . 
C406 C 0.4806(11) -0.4713(8) 0.6623(7) 0.079(4) Uani 1 1 d . . . 
H406 H 0.4819 -0.5016 0.6292 0.095 Uiso 1 1 calc R . . 
C407 C 0.4065(9) -0.3961(7) 0.6726(5) 0.061(3) Uani 1 1 d . . . 
C408 C 0.3220(9) -0.3519(7) 0.6424(5) 0.061(3) Uani 1 1 d . . . 
C409 C 0.2876(11) -0.3736(9) 0.5951(6) 0.084(4) Uani 1 1 d . . . 
H409 H 0.3222 -0.4241 0.5764 0.101 Uiso 1 1 calc R . . 
C410 C 0.2016(13) -0.3201(10) 0.5755(6) 0.097(5) Uani 1 1 d . . . 
H410 H 0.1776 -0.3342 0.5428 0.117 Uiso 1 1 calc R . . 
C411 C 0.1496(10) -0.2463(9) 0.6028(7) 0.096(4) Uani 1 1 d . . . 
H411 H 0.0905 -0.2108 0.5893 0.115 Uiso 1 1 calc R . . 
C412 C 0.1860(9) -0.2247(8) 0.6511(5) 0.071(3) Uani 1 1 d . . . 
H412 H 0.1528 -0.1738 0.6697 0.085 Uiso 1 1 calc R . . 
C413 C 0.2700(8) -0.2791(7) 0.6700(5) 0.056(3) Uani 1 1 d . . . 
C500 C 0.2612(6) 0.1982(6) 0.6987(4) 0.042(2) Uani 1 1 d . . . 
C501 C 0.2516(7) 0.2570(6) 0.6428(4) 0.049(3) Uani 1 1 d . . . 
C502 C 0.1772(8) 0.3437(7) 0.6480(4) 0.061(3) Uani 1 1 d . . . 
C503 C 0.0852(10) 0.3683(8) 0.6468(6) 0.085(4) Uani 1 1 d . . . 
H503 H 0.0600 0.3294 0.6438 0.103 Uiso 1 1 calc R . . 
C504 C 0.0312(11) 0.4548(11) 0.6502(7) 0.112(5) Uani 1 1 d . . . 
H504 H -0.0327 0.4752 0.6499 0.135 Uiso 1 1 calc R . . 
C505 C 0.0685(16) 0.5096(9) 0.6541(8) 0.120(6) Uani 1 1 d . . . 
H505 H 0.0296 0.5677 0.6540 0.144 Uiso 1 1 calc R . . 
C506 C 0.1572(13) 0.4856(9) 0.6579(7) 0.095(5) Uani 1 1 d . . . 
H506 H 0.1806 0.5254 0.6628 0.114 Uiso 1 1 calc R . . 
C507 C 0.2147(9) 0.4014(7) 0.6544(5) 0.064(3) Uani 1 1 d . . . 
C508 C 0.3121(10) 0.3570(7) 0.6531(4) 0.064(3) Uani 1 1 d . . . 
C509 C 0.3801(11) 0.3831(8) 0.6574(5) 0.077(4) Uani 1 1 d . . . 
H509 H 0.3651 0.4407 0.6610 0.092 Uiso 1 1 calc R . . 
C510 C 0.4674(12) 0.3272(11) 0.6564(6) 0.091(5) Uani 1 1 d . . . 
H510 H 0.5133 0.3456 0.6608 0.109 Uiso 1 1 calc R . . 
C511 C 0.4912(9) 0.2428(8) 0.6490(5) 0.077(4) Uani 1 1 d . . . 
H511 H 0.5531 0.2041 0.6485 0.092 Uiso 1 1 calc R . . 
C512 C 0.4251(9) 0.2155(7) 0.6422(4) 0.061(3) Uani 1 1 d . . . 
H512 H 0.4405 0.1582 0.6366 0.073 Uiso 1 1 calc R . . 
C513 C 0.3368(8) 0.2728(7) 0.6438(4) 0.054(3) Uani 1 1 d . . . 
C600 C 0.5205(7) -0.1022(5) 0.7097(4) 0.036(2) Uani 1 1 d . . . 
C601 C 0.5846(6) -0.1437(5) 0.6589(4) 0.040(2) Uani 1 1 d . . . 
C602 C 0.6540(7) -0.2319(6) 0.6784(4) 0.048(2) Uani 1 1 d . . . 
C603 C 0.6379(9) -0.3019(7) 0.6885(5) 0.065(3) Uani 1 1 d . . . 
H603 H 0.5795 -0.2999 0.6843 0.078 Uiso 1 1 calc R . . 
C604 C 0.7124(11) -0.3758(8) 0.7052(6) 0.087(4) Uani 1 1 d . . . 
H604 H 0.7045 -0.4257 0.7122 0.105 Uiso 1 1 calc R . . 
C605 C 0.7970(12) -0.3788(9) 0.7118(6) 0.096(4) Uani 1 1 d . . . 
H605 H 0.8456 -0.4296 0.7250 0.115 Uiso 1 1 calc R . . 
C606 C 0.8114(9) -0.3081(9) 0.6993(6) 0.086(4) Uani 1 1 d . . . 
H606 H 0.8700 -0.3102 0.7023 0.103 Uiso 1 1 calc R . . 
C607 C 0.7378(8) -0.2334(7) 0.6820(5) 0.058(3) Uani 1 1 d . . . 
C608 C 0.7335(7) -0.1505(7) 0.6639(4) 0.054(3) Uani 1 1 d . . . 
C609 C 0.8019(9) -0.1238(9) 0.6604(6) 0.081(4) Uani 1 1 d . . . 
H609 H 0.8621 -0.1589 0.6721 0.097 Uiso 1 1 calc R . . 
C610 C 0.7756(11) -0.0426(11) 0.6387(6) 0.090(5) Uani 1 1 d . . . 
H610 H 0.8202 -0.0216 0.6358 0.108 Uiso 1 1 calc R . . 
C611 C 0.6880(10) 0.0112(8) 0.6207(5) 0.073(4) Uani 1 1 d . . . 
H611 H 0.6741 0.0666 0.6059 0.088 Uiso 1 1 calc R . . 
C612 C 0.6228(8) -0.0178(6) 0.6250(4) 0.055(3) Uani 1 1 d . . . 
H612 H 0.5629 0.0162 0.6122 0.066 Uiso 1 1 calc R . . 
C613 C 0.6472(8) -0.0983(6) 0.6484(4) 0.049(3) Uani 1 1 d . . . 
O71 O 0.3841(7) 0.1116(7) 0.9969(3) 0.115(4) Uani 1 1 d . . . 
O72 O 0.4102(6) 0.1282(4) 0.5049(3) 0.075(2) Uani 1 1 d . . . 
O73 O -0.0373(13) -0.1122(12) 0.7665(8) 0.240(8) Uiso 1 1 d . . . 
C1 C 0.2302(10) 0.4145(11) 0.4949(9) 0.139(12) Uani 0.50 1 d PDU . . 
H1A H 0.2333 0.3882 0.5352 0.166 Uiso 0.50 1 calc PR . . 
Cl1 Cl 0.2765(6) 0.3373(4) 0.4506(3) 0.111(3) Uani 0.50 1 d PDU . . 
Cl2 Cl 0.1234(8) 0.4769(7) 0.4825(5) 0.181(5) Uani 0.50 1 d PDU . . 
Cl3 Cl 0.2885(9) 0.4722(7) 0.4964(6) 0.204(6) Uani 0.50 1 d PDU . . 
C2 C 0.8269(13) 0.6021(14) 0.0337(10) 0.126(11) Uiso 0.50 1 d PDU . . 
H2A H 0.8331 0.6410 0.0612 0.151 Uiso 0.50 1 calc PR I 1 
Cl4 Cl 0.8829(13) 0.6063(12) -0.0259(7) 0.125(6) Uiso 0.25 1 d PDU J 1 
Cl5 Cl 0.8671(16) 0.5076(12) 0.0676(9) 0.158(7) Uiso 0.25 1 d PDU J 1 
Cl6 Cl 0.7176(14) 0.633(2) 0.0234(14) 0.240(13) Uiso 0.25 1 d PDU J 1 
Cl4' Cl 0.7805(19) 0.5381(16) 0.0505(11) 0.192(10) Uiso 0.25 1 d PDU J 2 
Cl5' Cl 0.7853(14) 0.6645(12) -0.0260(8) 0.140(6) Uiso 0.25 1 d PDU J 2 
Cl6' Cl 0.9338(15) 0.5405(19) 0.0137(15) 0.256(14) Uiso 0.25 1 d PDU . 2 
 
loop_ 
 _atom_site_aniso_label 
 _atom_site_aniso_U_11 
 _atom_site_aniso_U_22 
 _atom_site_aniso_U_33 
 _atom_site_aniso_U_23 
 _atom_site_aniso_U_13 
 _atom_site_aniso_U_12 
Sn1 0.0429(4) 0.0494(4) 0.0385(4) -0.0132(3) 0.0025(3) -0.0230(4) 
Sn2 0.0401(4) 0.0515(4) 0.0305(3) -0.0019(3) -0.0004(3) -0.0214(4) 
Sn3 0.0421(5) 0.0721(5) 0.0602(5) -0.0243(4) 0.0097(4) -0.0309(4) 
Sn4 0.0552(5) 0.0607(5) 0.0476(4) -0.0039(3) 0.0074(3) -0.0366(4) 
Sn5 0.0482(5) 0.0348(4) 0.0394(4) -0.0025(3) -0.0100(3) -0.0160(4) 
Sn6 0.0447(4) 0.0335(4) 0.0325(3) -0.0035(3) 0.0013(3) -0.0166(4) 
O1 0.051(4) 0.048(4) 0.024(3) -0.004(3) 0.002(3) -0.025(4) 
O2 0.058(5) 0.068(5) 0.031(3) -0.011(3) 0.003(3) -0.027(4) 
O3 0.052(4) 0.074(5) 0.042(4) -0.015(3) 0.006(3) -0.039(4) 
O4 0.058(5) 0.078(5) 0.067(5) -0.023(4) 0.005(4) -0.046(5) 
O5 0.046(4) 0.039(4) 0.040(3) -0.002(3) 0.003(3) -0.022(3) 
O6 0.050(4) 0.042(4) 0.041(4) 0.002(3) 0.000(3) -0.022(4) 
O11 0.043(4) 0.074(5) 0.061(4) -0.033(4) 0.012(3) -0.029(4) 
O12 0.042(4) 0.050(4) 0.044(4) -0.015(3) 0.000(3) -0.024(4) 
O13 0.037(4) 0.070(5) 0.063(4) -0.027(4) 0.003(3) -0.026(4) 
O21 0.050(5) 0.056(4) 0.045(4) 0.013(3) -0.011(3) -0.024(4) 
O22 0.040(4) 0.042(4) 0.040(4) 0.004(3) 0.004(3) -0.016(4) 
O23 0.058(5) 0.057(4) 0.047(4) 0.007(3) -0.004(3) -0.038(4) 
O31 0.041(5) 0.098(6) 0.061(5) -0.034(4) 0.009(4) -0.030(5) 
O32 0.036(4) 0.058(5) 0.052(4) -0.015(4) 0.009(3) -0.024(4) 
O33 0.043(4) 0.043(4) 0.067(5) -0.008(4) -0.013(4) -0.008(4) 
O41 0.076(5) 0.058(5) 0.058(4) -0.002(3) 0.015(4) -0.045(4) 
O42 0.059(5) 0.039(4) 0.040(4) -0.004(3) 0.010(3) -0.024(4) 
O43 0.056(4) 0.037(4) 0.046(4) -0.004(3) 0.011(3) -0.024(4) 
O51 0.083(5) 0.037(4) 0.045(4) 0.003(3) -0.023(3) -0.028(4) 
O52 0.042(4) 0.026(4) 0.042(4) -0.003(3) -0.005(3) -0.011(3) 
O53 0.059(5) 0.047(4) 0.039(4) -0.015(3) 0.002(3) -0.024(4) 
O61 0.048(4) 0.042(4) 0.037(3) -0.005(3) 0.003(3) -0.020(4) 
O62 0.042(4) 0.040(4) 0.029(3) -0.007(3) 0.001(3) -0.019(4) 
O63 0.038(4) 0.049(4) 0.033(4) -0.006(3) 0.005(3) -0.014(4) 
C11 0.068(8) 0.080(8) 0.070(7) -0.022(6) 0.003(6) -0.052(7) 
C12 0.126(11) 0.091(9) 0.090(9) -0.011(7) 0.006(8) -0.085(9) 
C13 0.189(16) 0.109(12) 0.102(11) 0.001(9) -0.012(10) -0.101(13) 
C14 0.28(3) 0.115(16) 0.20(2) -0.007(14) 0.028(19) -0.120(19) 
C21 0.064(8) 0.105(10) 0.066(7) 0.000(6) -0.012(6) -0.062(8) 
C22 0.116(11) 0.167(14) 0.138(12) 0.002(10) 0.019(9) -0.115(11) 
C23 0.145(15) 0.227(19) 0.102(12) -0.023(12) 0.024(11) -0.116(15) 
C24 0.117(13) 0.139(15) 0.181(17) -0.001(12) -0.010(12) -0.103(13) 
C31 0.072(9) 0.129(12) 0.101(10) -0.017(9) 0.022(7) -0.058(9) 
C41 0.102(10) 0.089(9) 0.091(9) -0.006(7) 0.034(8) -0.060(9) 
C51 0.088(9) 0.064(7) 0.053(6) -0.002(5) -0.022(6) -0.028(7) 
C61 0.067(8) 0.072(8) 0.046(6) -0.028(5) -0.001(5) -0.024(7) 
C100 0.048(7) 0.049(6) 0.042(6) -0.013(5) 0.009(5) -0.020(6) 
C101 0.060(8) 0.081(9) 0.051(6) -0.037(6) 0.024(6) -0.039(8) 
C102 0.054(9) 0.076(9) 0.084(9) -0.044(8) 0.004(7) -0.025(8) 
C103 0.070(10) 0.083(11) 0.103(11) -0.050(9) -0.011(8) -0.022(10) 
C104 0.099(14) 0.084(12) 0.152(16) -0.050(11) -0.040(12) 0.005(12) 
C105 0.071(14) 0.13(2) 0.22(3) -0.125(19) -0.011(18) 0.009(14) 
C106 0.070(15) 0.16(2) 0.20(2) -0.118(18) 0.031(16) -0.038(17) 
C107 0.036(9) 0.120(14) 0.134(14) -0.083(12) 0.025(9) -0.026(11) 
C108 0.066(11) 0.145(16) 0.112(13) -0.082(12) 0.020(10) -0.058(12) 
C109 0.098(14) 0.27(3) 0.089(13) -0.118(16) 0.079(13) -0.120(19) 
C110 0.18(3) 0.35(4) 0.069(13) -0.069(18) 0.053(15) -0.20(3) 
C111 0.145(15) 0.21(2) 0.038(8) -0.026(9) 0.015(9) -0.132(16) 
C112 0.091(12) 0.142(15) 0.064(9) -0.025(9) 0.007(8) -0.073(12) 
C113 0.052(9) 0.119(12) 0.070(9) -0.060(9) 0.019(7) -0.048(9) 
C200 0.043(7) 0.058(7) 0.037(5) -0.009(5) 0.007(5) -0.015(6) 
C201 0.051(7) 0.063(7) 0.037(6) 0.011(5) -0.006(5) -0.025(7) 
C202 0.072(9) 0.118(11) 0.028(6) 0.005(6) -0.006(6) -0.056(9) 
C203 0.090(10) 0.139(13) 0.044(7) -0.022(7) 0.017(7) -0.075(10) 
C204 0.126(14) 0.20(2) 0.060(10) -0.042(11) 0.020(9) -0.107(16) 
C205 0.17(2) 0.24(3) 0.045(10) 0.015(13) -0.006(10) -0.14(2) 
C206 0.18(2) 0.170(19) 0.066(11) 0.053(11) -0.040(11) -0.127(18) 
C207 0.101(12) 0.126(13) 0.056(8) 0.049(8) -0.025(8) -0.066(11) 
C208 0.073(10) 0.088(11) 0.072(9) 0.033(8) -0.003(7) -0.024(9) 
C209 0.109(15) 0.096(13) 0.127(14) 0.070(11) -0.010(11) -0.030(12) 
C210 0.105(14) 0.064(10) 0.130(14) 0.041(10) -0.020(11) -0.005(10) 
C211 0.079(11) 0.067(10) 0.125(13) 0.002(9) -0.027(9) -0.009(9) 
C212 0.066(9) 0.066(9) 0.082(9) 0.006(7) -0.015(7) -0.024(8) 
C213 0.057(8) 0.071(9) 0.064(7) 0.029(6) -0.012(6) -0.031(8) 
C300 0.054(8) 0.037(6) 0.052(7) -0.005(5) -0.016(6) -0.011(6) 
C301 0.026(6) 0.061(8) 0.078(8) -0.033(6) -0.007(5) -0.002(6) 
C302 0.038(7) 0.083(9) 0.087(9) -0.035(7) -0.014(6) -0.008(7) 
C303 0.045(8) 0.086(10) 0.114(11) -0.044(9) -0.021(7) -0.008(8) 
C304 0.072(11) 0.081(12) 0.172(17) -0.060(11) -0.013(11) -0.001(11) 
C305 0.087(13) 0.077(12) 0.175(18) -0.030(12) -0.040(12) 0.025(11) 
C306 0.117(15) 0.088(12) 0.131(14) -0.016(10) -0.061(11) 0.001(12) 
C307 0.060(9) 0.075(10) 0.109(11) -0.028(8) -0.019(8) -0.005(9) 
C308 0.054(8) 0.076(9) 0.090(9) -0.028(7) -0.016(7) -0.021(8) 
C309 0.089(11) 0.105(12) 0.080(9) -0.014(8) -0.035(8) -0.041(10) 
C310 0.091(11) 0.130(14) 0.077(9) -0.041(10) 0.011(8) -0.076(11) 
C311 0.082(10) 0.102(11) 0.070(8) -0.041(8) 0.012(7) -0.060(10) 
C312 0.061(8) 0.073(8) 0.077(8) -0.027(6) 0.012(6) -0.043(7) 
C313 0.039(7) 0.062(8) 0.080(8) -0.026(7) 0.011(6) -0.023(7) 
C400 0.042(6) 0.039(6) 0.050(6) 0.002(5) -0.003(5) -0.014(6) 
C401 0.072(8) 0.038(6) 0.052(6) 0.000(5) 0.000(5) -0.034(7) 
C402 0.059(8) 0.036(6) 0.085(8) 0.009(6) -0.003(6) -0.032(7) 
C403 0.082(10) 0.047(8) 0.106(10) 0.017(7) -0.013(8) -0.036(8) 
C404 0.089(12) 0.060(10) 0.148(14) 0.029(9) -0.028(9) -0.042(10) 
C405 0.093(13) 0.048(9) 0.189(18) -0.021(11) 0.023(12) -0.039(10) 
C406 0.078(11) 0.057(9) 0.108(11) -0.007(8) 0.002(9) -0.035(9) 
C407 0.074(9) 0.044(7) 0.079(8) -0.009(6) 0.006(7) -0.037(8) 
C408 0.078(9) 0.045(7) 0.074(8) -0.002(6) 0.011(7) -0.039(7) 
C409 0.116(13) 0.070(9) 0.085(9) -0.018(8) 0.001(9) -0.056(10) 
C410 0.153(16) 0.094(12) 0.074(9) -0.012(8) -0.028(10) -0.077(13) 
C411 0.077(10) 0.079(10) 0.128(13) 0.008(9) -0.039(9) -0.029(9) 
C412 0.091(11) 0.061(8) 0.071(8) -0.013(6) -0.006(7) -0.040(9) 
C413 0.067(8) 0.048(7) 0.060(7) 0.004(5) -0.006(6) -0.032(7) 
C500 0.033(6) 0.034(6) 0.052(6) -0.002(5) -0.003(4) -0.007(5) 
C501 0.053(7) 0.033(6) 0.051(6) -0.005(4) -0.014(5) -0.008(6) 
C502 0.065(9) 0.042(7) 0.057(7) 0.001(5) -0.024(6) -0.003(7) 
C503 0.089(12) 0.046(8) 0.098(10) -0.010(6) -0.037(8) -0.004(9) 
C504 0.082(12) 0.085(12) 0.114(12) -0.002(9) -0.025(9) 0.020(11) 
C505 0.147(19) 0.035(9) 0.141(15) 0.003(8) -0.022(13) -0.003(12) 
C506 0.102(13) 0.045(9) 0.126(12) -0.015(8) 0.001(10) -0.019(10) 
C507 0.085(10) 0.033(7) 0.069(7) 0.002(5) -0.018(6) -0.019(7) 
C508 0.105(11) 0.046(7) 0.057(7) -0.002(5) -0.006(6) -0.046(8) 
C509 0.113(12) 0.062(9) 0.076(8) -0.005(6) -0.004(8) -0.056(10) 
C510 0.108(13) 0.114(13) 0.092(10) -0.013(9) -0.002(9) -0.085(12) 
C511 0.065(9) 0.074(9) 0.097(10) -0.011(7) 0.007(7) -0.034(8) 
C512 0.074(9) 0.053(7) 0.058(7) -0.006(5) -0.001(6) -0.030(8) 
C513 0.075(9) 0.052(7) 0.041(6) 0.003(5) -0.008(5) -0.035(7) 
C600 0.040(7) 0.032(5) 0.034(5) -0.001(4) -0.004(4) -0.013(5) 
C601 0.049(6) 0.032(5) 0.038(5) -0.001(4) 0.005(4) -0.016(5) 
C602 0.038(7) 0.048(7) 0.051(6) -0.004(5) 0.006(5) -0.012(6) 
C603 0.073(9) 0.043(7) 0.072(8) -0.008(6) 0.010(6) -0.019(7) 
C604 0.090(12) 0.037(8) 0.107(11) 0.003(7) -0.001(9) -0.001(9) 
C605 0.086(13) 0.064(10) 0.104(11) -0.003(8) -0.011(9) 0.001(10) 
C606 0.048(9) 0.079(10) 0.109(11) -0.008(8) -0.009(7) -0.005(9) 
C607 0.046(8) 0.055(8) 0.061(7) -0.016(5) -0.001(5) -0.007(7) 
C608 0.042(7) 0.057(7) 0.058(7) -0.014(5) 0.011(5) -0.017(7) 
C609 0.072(9) 0.096(11) 0.097(10) -0.033(8) 0.017(7) -0.054(9) 
C610 0.088(12) 0.130(14) 0.087(10) -0.039(9) 0.036(8) -0.079(12) 
C611 0.112(12) 0.072(9) 0.068(8) -0.007(6) 0.012(8) -0.070(10) 
C612 0.078(8) 0.052(7) 0.040(6) -0.003(5) 0.004(5) -0.033(7) 
C613 0.064(8) 0.053(7) 0.032(5) -0.013(5) 0.014(5) -0.027(7) 
O71 0.123(8) 0.188(11) 0.057(5) -0.035(6) 0.005(5) -0.083(9) 
O72 0.109(7) 0.059(5) 0.057(5) 0.004(4) 0.026(4) -0.037(5) 
C1 0.19(3) 0.21(3) 0.026(12) -0.003(16) -0.029(16) -0.09(3) 
Cl1 0.176(8) 0.073(5) 0.085(5) -0.025(4) 0.031(5) -0.052(5) 
Cl2 0.123(9) 0.156(10) 0.169(10) -0.010(8) 0.000(7) 0.029(8) 
Cl3 0.256(14) 0.137(9) 0.230(12) -0.031(8) -0.149(11) -0.083(10) 
 
_geom_special_details 
; 
 All esds (except the esd in the dihedral angle between two l.s. planes) 
 are estimated using the full covariance matrix.  The cell esds are taken 
 into account individually in the estimation of esds in distances, angles 
 and torsion angles; correlations between esds in cell parameters are only 
 used when they are defined by crystal symmetry.  An approximate (isotropic) 
 treatment of cell esds is used for estimating esds involving l.s. planes. 
; 
 
loop_ 
 _geom_bond_atom_site_label_1 
 _geom_bond_atom_site_label_2 
 _geom_bond_distance 
 _geom_bond_site_symmetry_2 
 _geom_bond_publ_flag 
Sn1 O11 2.014(6) . ? 
Sn1 O2 2.086(7) . ? 
Sn1 O1 2.101(6) . ? 
Sn1 C11 2.136(9) . ? 
Sn1 O53 2.175(6) . ? 
Sn1 O12 2.177(5) . ? 
Sn2 O21 2.025(6) . ? 
Sn2 O1 2.092(6) . ? 
Sn2 O2 2.104(6) . ? 
Sn2 C21 2.139(9) . ? 
Sn2 O22 2.159(6) . ? 
Sn2 O63 2.179(6) . ? 
Sn3 O31 2.018(8) . ? 
Sn3 O3 2.101(7) . ? 
Sn3 O4 2.112(7) . ? 
Sn3 C31 2.118(12) . ? 
Sn3 O13 2.172(6) . ? 
Sn3 O32 2.175(6) . ? 
Sn4 O41 2.000(6) . ? 
Sn4 O3 2.087(6) . ? 
Sn4 C41 2.105(11) . ? 
Sn4 O4 2.113(7) . ? 
Sn4 O23 2.159(6) . ? 
Sn4 O42 2.160(6) . ? 
Sn5 O51 2.014(6) . ? 
Sn5 O5 2.099(6) . ? 
Sn5 O6 2.101(6) . ? 
Sn5 C51 2.113(10) . ? 
Sn5 O33 2.171(7) . ? 
Sn5 O52 2.180(5) . ? 
Sn6 O61 2.024(6) . ? 
Sn6 O5 2.083(6) . ? 
Sn6 O6 2.104(6) . ? 
Sn6 C61 2.140(9) . ? 
Sn6 O62 2.167(5) . ? 
Sn6 O43 2.179(6) . ? 
O11 C101 1.402(11) . ? 
O12 C100 1.259(11) . ? 
O13 C100 1.260(11) . ? 
O21 C201 1.394(11) . ? 
O22 C200 1.279(11) . ? 
O23 C200 1.266(11) . ? 
O31 C301 1.359(13) . ? 
O32 C300 1.286(11) . ? 
O33 C300 1.259(11) . ? 
O41 C401 1.406(11) . ? 
O42 C400 1.241(11) . ? 
O43 C400 1.279(10) . ? 
O51 C501 1.397(10) . ? 
O52 C500 1.237(10) . ? 
O53 C500 1.267(10) . ? 
O61 C601 1.406(10) . ? 
O62 C600 1.259(10) . ? 
O63 C600 1.251(10) . ? 
C11 C12 1.526(12) . ? 
C12 C13 1.516(12) . ? 
C13 C14 1.467(15) . ? 
C21 C22 1.532(12) . ? 
C22 C23 1.510(13) . ? 
C23 C24 1.372(14) . ? 
C31 C32 1.503(14) . ? 
C31 C32' 1.531(16) . ? 
C32 C33 1.507(15) . ? 
C33 C34 1.463(16) . ? 
C32' C33' 1.508(17) . ? 
C33' C34' 1.450(18) . ? 
C41 C42' 1.487(15) . ? 
C41 C42 1.522(14) . ? 
C42 C43 1.494(15) . ? 
C43 C44 1.465(16) . ? 
C42' C43' 1.511(16) . ? 
C43' C44' 1.448(17) . ? 
C51 C52' 1.496(16) . ? 
C51 C52 1.515(14) . ? 
C52 C53 1.564(15) . ? 
C53 C54 1.405(16) . ? 
C52' C53' 1.523(16) . ? 
C53' C54' 1.440(17) . ? 
C61 C62' 1.503(15) . ? 
C61 C62 1.531(12) . ? 
C62 C63 1.504(13) . ? 
C63 C64 1.448(14) . ? 
C62' C63' 1.525(17) . ? 
C63' C64' 1.455(18) . ? 
C100 C101 1.541(13) . ? 
C101 C102 1.531(18) . ? 
C101 C113 1.547(17) . ? 
C102 C103 1.372(18) . ? 
C102 C107 1.397(17) . ? 
C103 C104 1.40(2) . ? 
C104 C105 1.40(3) . ? 
C105 C106 1.39(3) . ? 
C106 C107 1.40(3) . ? 
C107 C108 1.46(2) . ? 
C108 C109 1.40(2) . ? 
C108 C113 1.407(19) . ? 
C109 C110 1.29(3) . ? 
C110 C111 1.44(3) . ? 
C111 C112 1.394(17) . ? 
C112 C113 1.353(19) . ? 
C200 C201 1.567(14) . ? 
C201 C213 1.486(15) . ? 
C201 C202 1.505(13) . ? 
C202 C203 1.333(17) . ? 
C202 C207 1.451(18) . ? 
C203 C204 1.412(18) . ? 
C204 C205 1.34(3) . ? 
C205 C206 1.39(3) . ? 
C206 C207 1.45(2) . ? 
C207 C208 1.42(2) . ? 
C208 C209 1.35(2) . ? 
C208 C213 1.386(15) . ? 
C209 C210 1.35(2) . ? 
C210 C211 1.39(2) . ? 
C211 C212 1.381(17) . ? 
C212 C213 1.406(16) . ? 
C300 C301 1.528(14) . ? 
C301 C313 1.536(14) . ? 
C301 C302 1.540(16) . ? 
C302 C303 1.387(15) . ? 
C302 C307 1.437(17) . ? 
C303 C304 1.40(2) . ? 
C304 C305 1.39(2) . ? 
C305 C306 1.40(2) . ? 
C306 C307 1.363(19) . ? 
C307 C308 1.488(16) . ? 
C308 C309 1.348(15) . ? 
C308 C313 1.410(16) . ? 
C309 C310 1.369(18) . ? 
C310 C311 1.386(19) . ? 
C311 C312 1.370(15) . ? 
C312 C313 1.346(14) . ? 
C400 C401 1.556(12) . ? 
C401 C402 1.490(15) . ? 
C401 C413 1.514(14) . ? 
C402 C403 1.392(16) . ? 
C402 C407 1.401(14) . ? 
C403 C404 1.389(18) . ? 
C404 C405 1.43(2) . ? 
C405 C406 1.318(19) . ? 
C406 C407 1.392(17) . ? 
C407 C408 1.440(16) . ? 
C408 C413 1.382(15) . ? 
C408 C409 1.383(16) . ? 
C409 C410 1.388(19) . ? 
C410 C411 1.391(19) . ? 
C411 C412 1.419(17) . ? 
C412 C413 1.364(16) . ? 
C500 C501 1.567(13) . ? 
C501 C502 1.506(14) . ? 
C501 C513 1.538(14) . ? 
C502 C503 1.378(16) . ? 
C502 C507 1.417(14) . ? 
C503 C504 1.409(18) . ? 
C504 C505 1.36(2) . ? 
C505 C506 1.33(2) . ? 
C506 C507 1.385(17) . ? 
C507 C508 1.446(16) . ? 
C508 C509 1.384(16) . ? 
C508 C513 1.396(14) . ? 
C509 C510 1.346(18) . ? 
C510 C511 1.392(18) . ? 
C511 C512 1.380(15) . ? 
C512 C513 1.367(15) . ? 
C600 C601 1.537(12) . ? 
C601 C602 1.533(13) . ? 
C601 C613 1.556(12) . ? 
C602 C607 1.367(14) . ? 
C602 C603 1.378(13) . ? 
C603 C604 1.396(17) . ? 
C604 C605 1.377(19) . ? 
C605 C606 1.380(18) . ? 
C606 C607 1.400(16) . ? 
C607 C608 1.472(15) . ? 
C608 C613 1.362(14) . ? 
C608 C609 1.389(14) . ? 
C609 C610 1.376(19) . ? 
C610 C611 1.398(18) . ? 
C611 C612 1.368(14) . ? 
C612 C613 1.382(14) . ? 
C1 Cl2 1.643(14) . ? 
C1 Cl1 1.645(13) . ? 
C1 Cl3 1.672(15) . ? 
C2 Cl4' 1.635(16) . ? 
C2 Cl4 1.636(15) . ? 
C2 Cl6 1.655(16) . ? 
C2 Cl5 1.661(15) . ? 
C2 Cl5' 1.667(15) . ? 
C2 Cl6' 1.686(16) . ? 
Cl6' Cl6' 2.12(4) 2_765 ? 
 
loop_ 
 _geom_angle_atom_site_label_1 
 _geom_angle_atom_site_label_2 
 _geom_angle_atom_site_label_3 
 _geom_angle 
 _geom_angle_site_symmetry_1 
 _geom_angle_site_symmetry_3 
 _geom_angle_publ_flag 
O11 Sn1 O2 97.7(3) . . ? 
O11 Sn1 O1 158.8(2) . . ? 
O2 Sn1 O1 73.2(2) . . ? 
O11 Sn1 C11 98.3(3) . . ? 
O2 Sn1 C11 101.7(4) . . ? 
O1 Sn1 C11 102.2(3) . . ? 
O11 Sn1 O53 98.0(3) . . ? 
O2 Sn1 O53 157.1(2) . . ? 
O1 Sn1 O53 86.3(2) . . ? 
C11 Sn1 O53 92.5(3) . . ? 
O11 Sn1 O12 77.0(2) . . ? 
O2 Sn1 O12 88.1(2) . . ? 
O1 Sn1 O12 83.6(2) . . ? 
C11 Sn1 O12 169.7(3) . . ? 
O53 Sn1 O12 79.3(2) . . ? 
O21 Sn2 O1 158.5(2) . . ? 
O21 Sn2 O2 97.6(3) . . ? 
O1 Sn2 O2 73.0(2) . . ? 
O21 Sn2 C21 98.4(3) . . ? 
O1 Sn2 C21 102.3(3) . . ? 
O2 Sn2 C21 100.2(4) . . ? 
O21 Sn2 O22 77.8(2) . . ? 
O1 Sn2 O22 82.3(2) . . ? 
O2 Sn2 O22 87.1(2) . . ? 
C21 Sn2 O22 172.2(4) . . ? 
O21 Sn2 O63 97.7(2) . . ? 
O1 Sn2 O63 87.6(2) . . ? 
O2 Sn2 O63 158.9(2) . . ? 
C21 Sn2 O63 91.7(3) . . ? 
O22 Sn2 O63 82.1(2) . . ? 
O31 Sn3 O3 158.8(2) . . ? 
O31 Sn3 O4 98.7(3) . . ? 
O3 Sn3 O4 73.2(2) . . ? 
O31 Sn3 C31 99.2(4) . . ? 
O3 Sn3 C31 101.3(4) . . ? 
O4 Sn3 C31 99.2(4) . . ? 
O31 Sn3 O13 96.5(3) . . ? 
O3 Sn3 O13 87.1(2) . . ? 
O4 Sn3 O13 158.2(2) . . ? 
C31 Sn3 O13 93.7(4) . . ? 
O31 Sn3 O32 77.3(3) . . ? 
O3 Sn3 O32 82.7(2) . . ? 
O4 Sn3 O32 86.9(2) . . ? 
C31 Sn3 O32 173.4(4) . . ? 
O13 Sn3 O32 81.3(2) . . ? 
O41 Sn4 O3 160.0(2) . . ? 
O41 Sn4 C41 99.6(4) . . ? 
O3 Sn4 C41 99.6(4) . . ? 
O41 Sn4 O4 98.6(3) . . ? 
O3 Sn4 O4 73.4(2) . . ? 
C41 Sn4 O4 97.8(4) . . ? 
O41 Sn4 O23 96.0(3) . . ? 
O3 Sn4 O23 87.6(2) . . ? 
C41 Sn4 O23 95.2(4) . . ? 
O4 Sn4 O23 158.6(2) . . ? 
O41 Sn4 O42 77.5(2) . . ? 
O3 Sn4 O42 83.6(2) . . ? 
C41 Sn4 O42 175.5(4) . . ? 
O4 Sn4 O42 86.1(3) . . ? 
O23 Sn4 O42 81.8(2) . . ? 
O51 Sn5 O5 157.2(2) . . ? 
O51 Sn5 O6 95.5(3) . . ? 
O5 Sn5 O6 73.1(2) . . ? 
O51 Sn5 C51 102.8(3) . . ? 
O5 Sn5 C51 98.6(3) . . ? 
O6 Sn5 C51 99.6(4) . . ? 
O51 Sn5 O33 99.3(3) . . ? 
O5 Sn5 O33 87.5(2) . . ? 
O6 Sn5 O33 158.5(2) . . ? 
C51 Sn5 O33 92.2(4) . . ? 
O51 Sn5 O52 77.2(2) . . ? 
O5 Sn5 O52 82.7(2) . . ? 
O6 Sn5 O52 88.4(2) . . ? 
C51 Sn5 O52 171.9(4) . . ? 
O33 Sn5 O52 79.8(2) . . ? 
O61 Sn6 O5 159.8(2) . . ? 
O61 Sn6 O6 98.1(2) . . ? 
O5 Sn6 O6 73.4(2) . . ? 
O61 Sn6 C61 99.4(3) . . ? 
O5 Sn6 C61 100.3(3) . . ? 
O6 Sn6 C61 102.2(3) . . ? 
O61 Sn6 O62 77.1(2) . . ? 
O5 Sn6 O62 83.9(2) . . ? 
O6 Sn6 O62 85.5(2) . . ? 
C61 Sn6 O62 172.0(3) . . ? 
O61 Sn6 O43 95.1(2) . . ? 
O5 Sn6 O43 88.7(2) . . ? 
O6 Sn6 O43 158.9(2) . . ? 
C61 Sn6 O43 91.7(3) . . ? 
O62 Sn6 O43 81.6(2) . . ? 
Sn2 O1 Sn1 106.4(2) . . ? 
Sn1 O2 Sn2 106.4(3) . . ? 
Sn4 O3 Sn3 106.7(3) . . ? 
Sn3 O4 Sn4 105.4(3) . . ? 
Sn6 O5 Sn5 106.6(2) . . ? 
Sn5 O6 Sn6 105.7(2) . . ? 
C101 O11 Sn1 118.3(5) . . ? 
C100 O12 Sn1 114.1(5) . . ? 
C100 O13 Sn3 129.4(7) . . ? 
C201 O21 Sn2 119.1(5) . . ? 
C200 O22 Sn2 115.0(6) . . ? 
C200 O23 Sn4 131.3(6) . . ? 
C301 O31 Sn3 119.4(6) . . ? 
C300 O32 Sn3 112.6(6) . . ? 
C300 O33 Sn5 131.2(7) . . ? 
C401 O41 Sn4 119.8(5) . . ? 
C400 O42 Sn4 114.4(6) . . ? 
C400 O43 Sn6 128.1(6) . . ? 
C501 O51 Sn5 118.9(5) . . ? 
C500 O52 Sn5 113.8(6) . . ? 
C500 O53 Sn1 129.6(6) . . ? 
C601 O61 Sn6 118.4(5) . . ? 
C600 O62 Sn6 115.7(5) . . ? 
C600 O63 Sn2 131.3(6) . . ? 
C12 C11 Sn1 114.2(7) . . ? 
C13 C12 C11 114.7(10) . . ? 
C14 C13 C12 116.8(13) . . ? 
C22 C21 Sn2 118.2(7) . . ? 
C23 C22 C21 113.1(11) . . ? 
C24 C23 C22 120.1(14) . . ? 
C32 C31 C32' 35(2) . . ? 
C32 C31 Sn3 119.9(12) . . ? 
C32' C31 Sn3 116(2) . . ? 
C31 C32 C33 113.4(15) . . ? 
C34 C33 C32 116.6(18) . . ? 
C33' C32' C31 116(2) . . ? 
C34' C33' C32' 120(3) . . ? 
C42' C41 C42 33.9(10) . . ? 
C42' C41 Sn4 119.1(14) . . ? 
C42 C41 Sn4 117.0(11) . . ? 
C43 C42 C41 119.1(15) . . ? 
C44 C43 C42 116.6(18) . . ? 
C41 C42' C43' 109.0(17) . . ? 
C44' C43' C42' 117(2) . . ? 
C52' C51 C52 30.2(13) . . ? 
C52' C51 Sn5 122.6(15) . . ? 
C52 C51 Sn5 118.9(10) . . ? 
C51 C52 C53 105.4(13) . . ? 
C54 C53 C52 118.9(17) . . ? 
C51 C52' C53' 116.9(18) . . ? 
C54' C53' C52' 115(2) . . ? 
C62' C61 C62 30.7(11) . . ? 
C62' C61 Sn6 124.9(15) . . ? 
C62 C61 Sn6 112.7(8) . . ? 
C63 C62 C61 113.6(11) . . ? 
C64 C63 C62 119.6(14) . . ? 
C61 C62' C63' 111.2(19) . . ? 
C64' C63' C62' 116(2) . . ? 
O12 C100 O13 125.1(8) . . ? 
O12 C100 C101 116.6(9) . . ? 
O13 C100 C101 118.2(9) . . ? 
O11 C101 C102 111.8(9) . . ? 
O11 C101 C113 113.2(9) . . ? 
C102 C101 C113 103.1(10) . . ? 
O11 C101 C100 110.6(8) . . ? 
C102 C101 C100 111.3(9) . . ? 
C113 C101 C100 106.5(8) . . ? 
C103 C102 C107 121.6(16) . . ? 
C103 C102 C101 129.4(11) . . ? 
C107 C102 C101 108.9(15) . . ? 
C102 C103 C104 120.5(15) . . ? 
C103 C104 C105 119(2) . . ? 
C106 C105 C104 120(2) . . ? 
C107 C106 C105 121(2) . . ? 
C102 C107 C106 118(2) . . ? 
C102 C107 C108 110.0(15) . . ? 
C106 C107 C108 132.1(17) . . ? 
C109 C108 C113 117(2) . . ? 
C109 C108 C107 133.7(18) . . ? 
C113 C108 C107 109.6(14) . . ? 
C110 C109 C108 123(2) . . ? 
C109 C110 C111 120.0(19) . . ? 
C112 C111 C110 120.1(19) . . ? 
C113 C112 C111 117.2(16) . . ? 
C112 C113 C108 123.3(15) . . ? 
C112 C113 C101 128.4(12) . . ? 
C108 C113 C101 108.3(15) . . ? 
O23 C200 O22 125.0(9) . . ? 
O23 C200 C201 118.5(9) . . ? 
O22 C200 C201 116.4(8) . . ? 
O21 C201 C213 113.8(8) . . ? 
O21 C201 C202 113.5(8) . . ? 
C213 C201 C202 102.6(9) . . ? 
O21 C201 C200 110.3(8) . . ? 
C213 C201 C200 110.9(8) . . ? 
C202 C201 C200 105.2(8) . . ? 
C203 C202 C207 123.1(11) . . ? 
C203 C202 C201 130.0(12) . . ? 
C207 C202 C201 107.0(11) . . ? 
C202 C203 C204 119.2(15) . . ? 
C205 C204 C203 120.9(18) . . ? 
C204 C205 C206 122.4(17) . . ? 
C205 C206 C207 119.0(17) . . ? 
C208 C207 C206 133.8(15) . . ? 
C208 C207 C202 110.7(11) . . ? 
C206 C207 C202 115.5(16) . . ? 
C209 C208 C213 123.3(14) . . ? 
C209 C208 C207 129.8(14) . . ? 
C213 C208 C207 106.8(13) . . ? 
C208 C209 C210 118.5(14) . . ? 
C209 C210 C211 121.6(15) . . ? 
C212 C211 C210 119.5(15) . . ? 
C211 C212 C213 119.4(13) . . ? 
C208 C213 C212 117.4(13) . . ? 
C208 C213 C201 112.9(11) . . ? 
C212 C213 C201 129.7(10) . . ? 
O33 C300 O32 121.9(9) . . ? 
O33 C300 C301 120.6(10) . . ? 
O32 C300 C301 117.3(10) . . ? 
O31 C301 C300 111.2(9) . . ? 
O31 C301 C313 115.4(9) . . ? 
C300 C301 C313 105.6(8) . . ? 
O31 C301 C302 114.1(9) . . ? 
C300 C301 C302 109.0(9) . . ? 
C313 C301 C302 100.8(9) . . ? 
C303 C302 C307 120.7(13) . . ? 
C303 C302 C301 127.8(11) . . ? 
C307 C302 C301 111.5(10) . . ? 
C302 C303 C304 116.6(13) . . ? 
C305 C304 C303 122.7(14) . . ? 
C304 C305 C306 120.0(16) . . ? 
C307 C306 C305 118.5(15) . . ? 
C306 C307 C302 121.1(12) . . ? 
C306 C307 C308 131.7(13) . . ? 
C302 C307 C308 107.0(12) . . ? 
C309 C308 C313 119.6(12) . . ? 
C309 C308 C307 131.2(14) . . ? 
C313 C308 C307 109.1(11) . . ? 
C308 C309 C310 118.4(14) . . ? 
C309 C310 C311 123.3(12) . . ? 
C312 C311 C310 117.0(12) . . ? 
C313 C312 C311 121.2(13) . . ? 
C312 C313 C308 120.5(11) . . ? 
C312 C313 C301 127.9(12) . . ? 
C308 C313 C301 111.6(9) . . ? 
O42 C400 O43 125.2(8) . . ? 
O42 C400 C401 118.4(8) . . ? 
O43 C400 C401 116.4(8) . . ? 
O41 C401 C402 113.8(8) . . ? 
O41 C401 C413 112.7(8) . . ? 
C402 C401 C413 101.8(8) . . ? 
O41 C401 C400 108.4(7) . . ? 
C402 C401 C400 113.0(8) . . ? 
C413 C401 C400 106.9(8) . . ? 
C403 C402 C407 120.8(11) . . ? 
C403 C402 C401 128.3(11) . . ? 
C407 C402 C401 110.9(10) . . ? 
C404 C403 C402 117.7(13) . . ? 
C403 C404 C405 119.8(14) . . ? 
C406 C405 C404 121.7(15) . . ? 
C405 C406 C407 119.3(14) . . ? 
C406 C407 C402 120.5(12) . . ? 
C406 C407 C408 131.8(11) . . ? 
C402 C407 C408 107.7(10) . . ? 
C413 C408 C409 120.0(13) . . ? 
C413 C408 C407 109.6(10) . . ? 
C409 C408 C407 130.4(12) . . ? 
C408 C409 C410 118.7(12) . . ? 
C409 C410 C411 121.4(12) . . ? 
C410 C411 C412 119.2(14) . . ? 
C413 C412 C411 118.1(11) . . ? 
C412 C413 C408 122.6(11) . . ? 
C412 C413 C401 127.5(10) . . ? 
C408 C413 C401 109.9(11) . . ? 
O52 C500 O53 125.6(8) . . ? 
O52 C500 C501 117.6(8) . . ? 
O53 C500 C501 116.6(8) . . ? 
O51 C501 C502 114.0(8) . . ? 
O51 C501 C513 114.1(8) . . ? 
C502 C501 C513 102.2(8) . . ? 
O51 C501 C500 109.4(7) . . ? 
C502 C501 C500 113.0(8) . . ? 
C513 C501 C500 103.6(8) . . ? 
C503 C502 C507 122.1(11) . . ? 
C503 C502 C501 128.1(10) . . ? 
C507 C502 C501 109.9(10) . . ? 
C502 C503 C504 115.7(13) . . ? 
C505 C504 C503 121.3(15) . . ? 
C506 C505 C504 123.0(15) . . ? 
C505 C506 C507 118.8(14) . . ? 
C506 C507 C502 118.9(13) . . ? 
C506 C507 C508 132.1(12) . . ? 
C502 C507 C508 108.9(9) . . ? 
C509 C508 C513 118.1(13) . . ? 
C509 C508 C507 132.5(11) . . ? 
C513 C508 C507 109.4(10) . . ? 
C510 C509 C508 120.4(12) . . ? 
C509 C510 C511 120.9(12) . . ? 
C512 C511 C510 120.0(13) . . ? 
C513 C512 C511 118.4(11) . . ? 
C512 C513 C508 122.0(10) . . ? 
C512 C513 C501 128.2(9) . . ? 
C508 C513 C501 109.5(11) . . ? 
O63 C600 O62 125.2(8) . . ? 
O63 C600 C601 118.4(9) . . ? 
O62 C600 C601 116.3(8) . . ? 
O61 C601 C602 112.7(7) . . ? 
O61 C601 C600 111.0(8) . . ? 
C602 C601 C600 110.6(7) . . ? 
O61 C601 C613 114.0(7) . . ? 
C602 C601 C613 100.6(8) . . ? 
C600 C601 C613 107.3(7) . . ? 
C607 C602 C603 123.3(11) . . ? 
C607 C602 C601 110.2(9) . . ? 
C603 C602 C601 126.5(9) . . ? 
C602 C603 C604 116.1(12) . . ? 
C605 C604 C603 122.2(13) . . ? 
C604 C605 C606 120.2(14) . . ? 
C605 C606 C607 118.6(13) . . ? 
C602 C607 C606 119.6(11) . . ? 
C602 C607 C608 109.9(10) . . ? 
C606 C607 C608 130.5(11) . . ? 
C613 C608 C609 121.4(11) . . ? 
C613 C608 C607 108.9(9) . . ? 
C609 C608 C607 129.7(12) . . ? 
C610 C609 C608 114.9(13) . . ? 
C609 C610 C611 124.6(12) . . ? 
C612 C611 C610 118.6(11) . . ? 
C611 C612 C613 117.7(12) . . ? 
C608 C613 C612 122.7(10) . . ? 
C608 C613 C601 110.3(9) . . ? 
C612 C613 C601 127.0(10) . . ? 
Cl2 C1 Cl1 115.5(11) . . ? 
Cl2 C1 Cl3 109.0(12) . . ? 
Cl1 C1 Cl3 112.0(11) . . ? 
Cl4' C2 Cl4 128(2) . . ? 
Cl4' C2 Cl6 59.6(13) . . ? 
Cl4 C2 Cl6 114.1(16) . . ? 
Cl4' C2 Cl5 48.1(11) . . ? 
Cl4 C2 Cl5 113.4(15) . . ? 
Cl6 C2 Cl5 107.5(14) . . ? 
Cl4' C2 Cl5' 114.7(17) . . ? 
Cl4 C2 Cl5' 53.5(10) . . ? 
Cl6 C2 Cl5' 65.3(12) . . ? 
Cl5 C2 Cl5' 150(2) . . ? 
Cl4' C2 Cl6' 105.4(16) . . ? 
Cl4 C2 Cl6' 49.8(12) . . ? 
Cl6 C2 Cl6' 148(2) . . ? 
Cl5 C2 Cl6' 67.2(13) . . ? 
Cl5' C2 Cl6' 103.0(14) . . ? 
C2 Cl6' Cl6' 177(3) . 2_765 ? 
 
_diffrn_measured_fraction_theta_max    0.945 
_diffrn_reflns_theta_full              22.49 
_diffrn_measured_fraction_theta_full   0.945 
_refine_diff_density_max    1.353 
_refine_diff_density_min   -0.848 
_refine_diff_density_rms    0.111 
